# Supplementary material
Source: ML conference proceedings conference paper supplement (https://proceedings.neurips.cc/paper_files/paper/2020/hash/c94a589bdd47870b1d74b258d1ce3b33-Abstract.html)

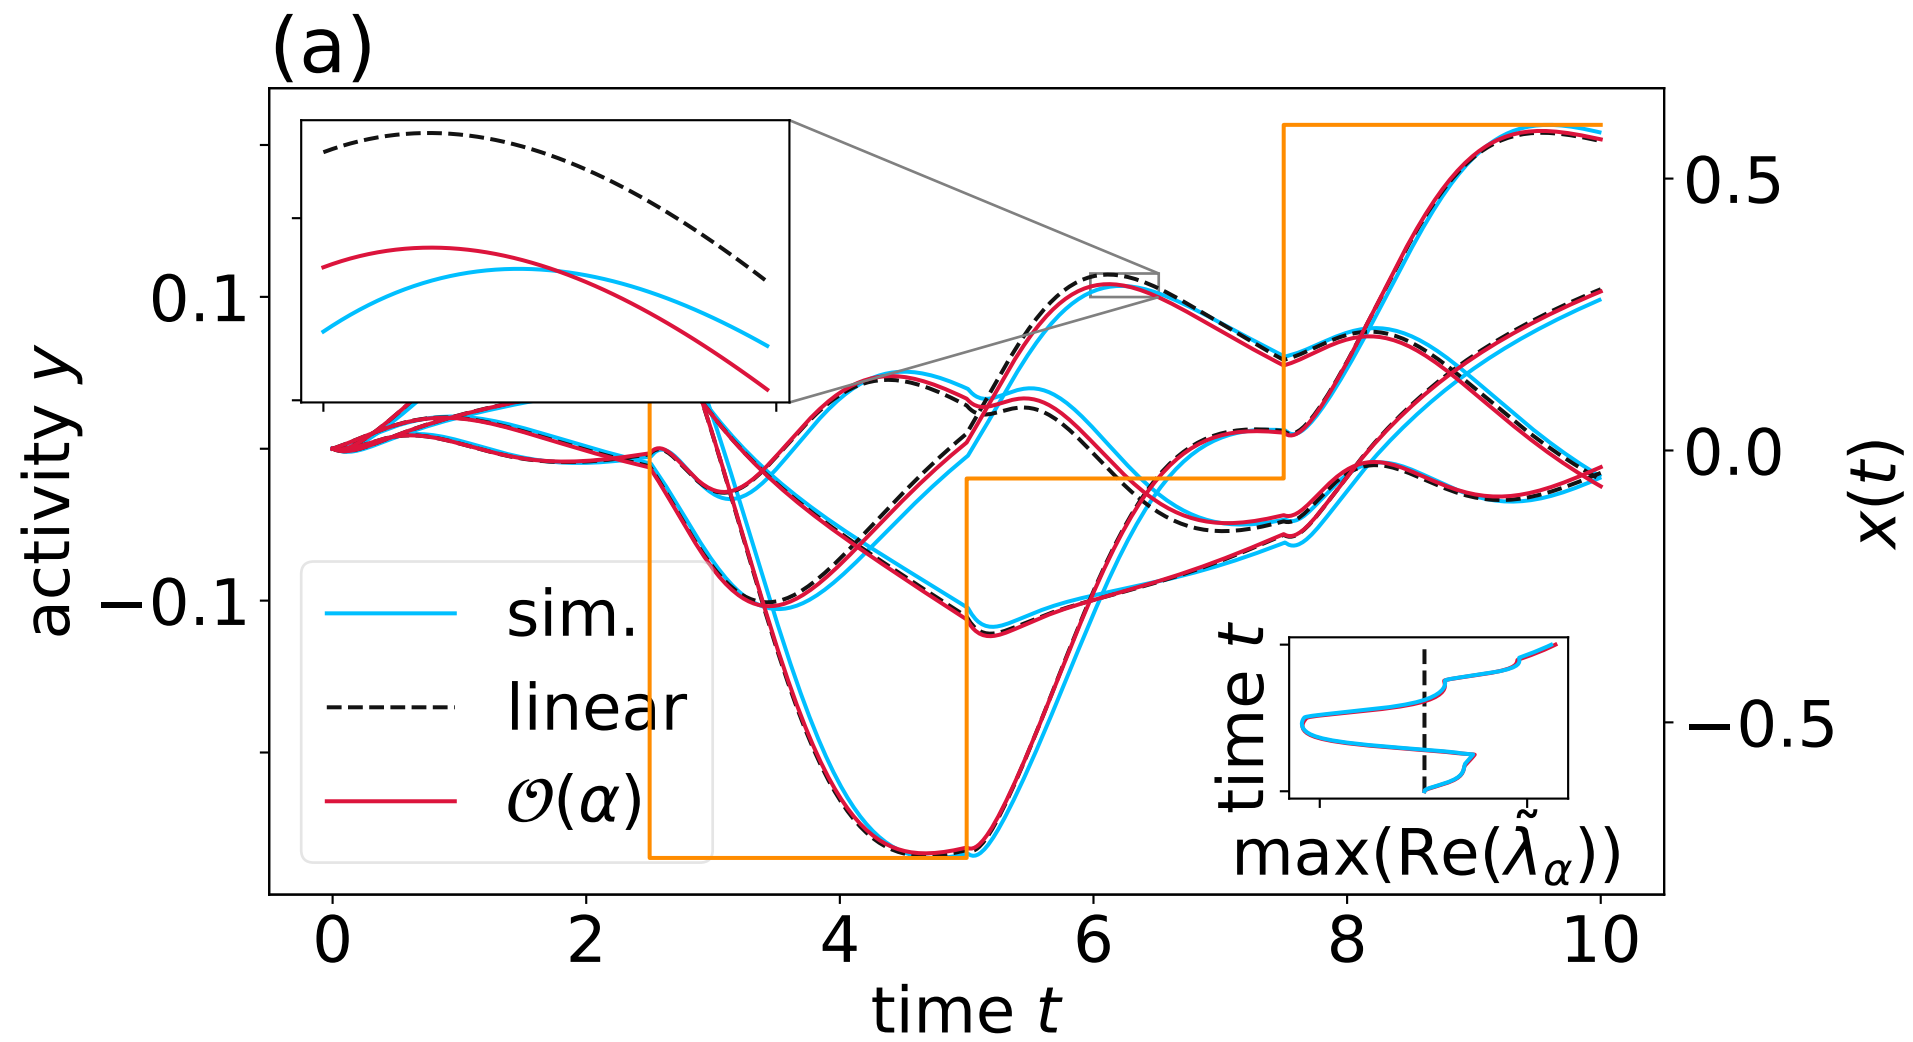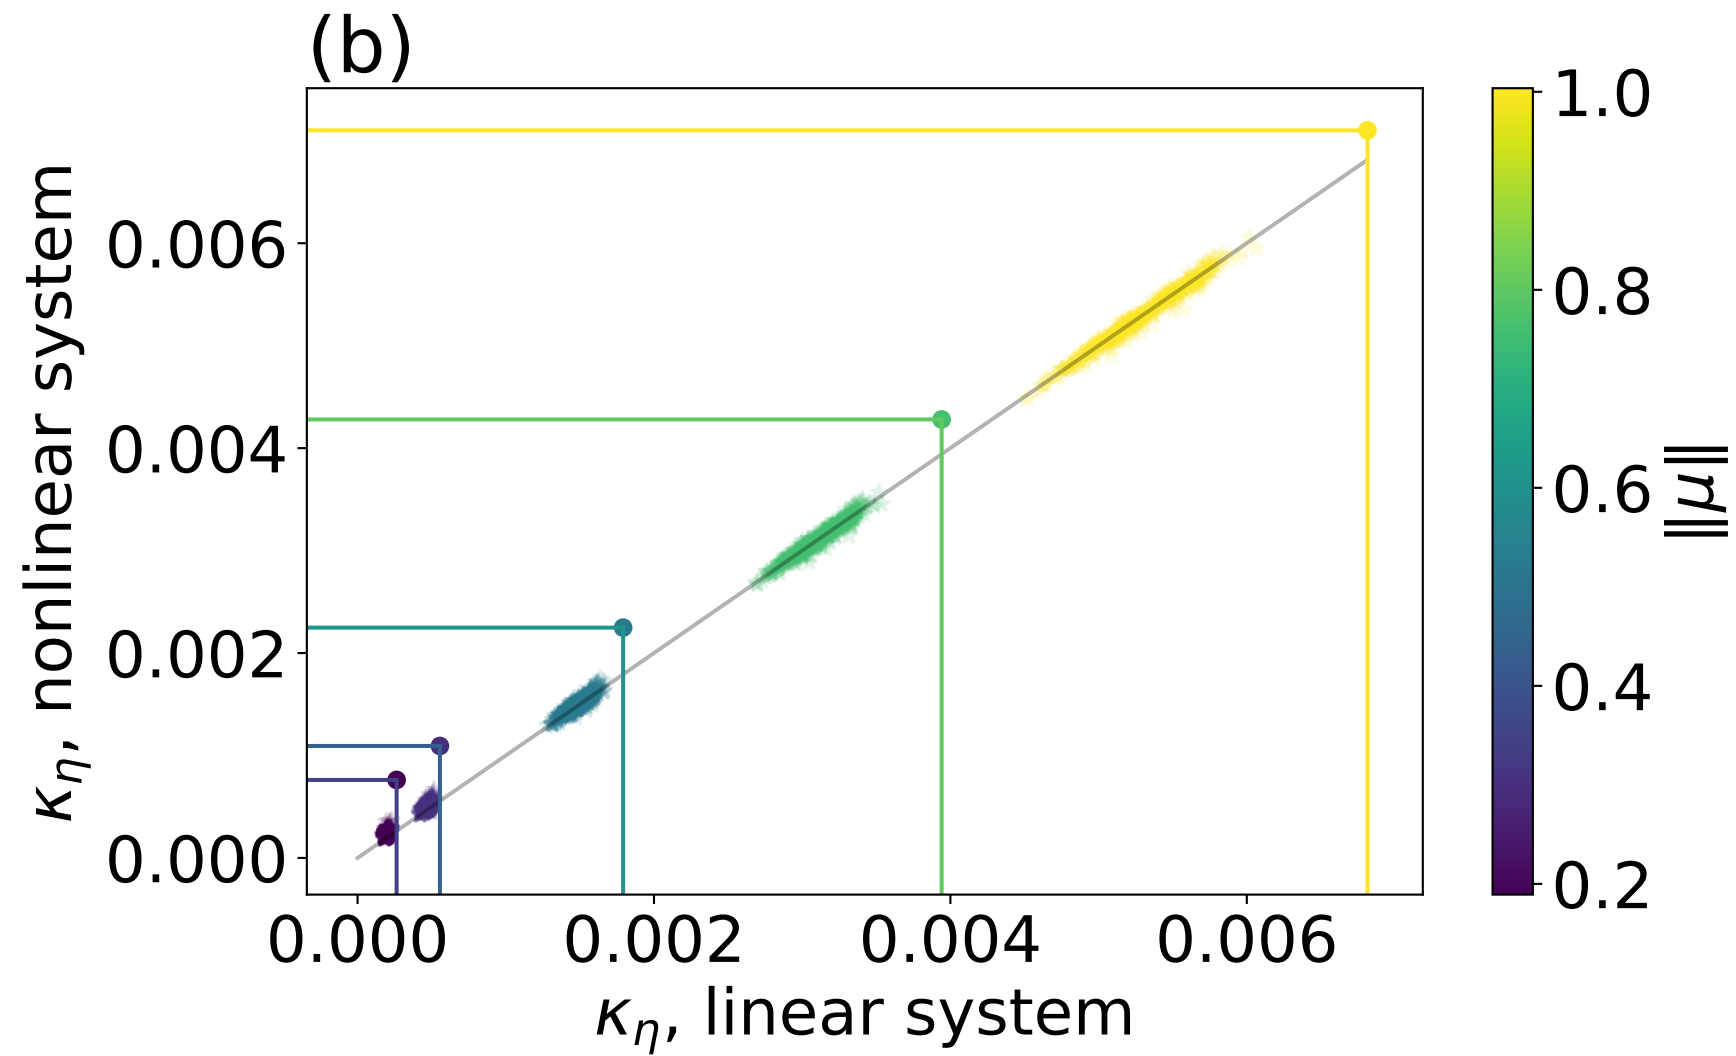

Supplement: Supplementary file [file c94a589bdd47870b1d74b258d1ce3b33-Supplemental.zip]
